# Supplementary material
Source: PubMed Central journal article supplement (PMC4123395)
Supplement: CJN.06700613_CJN06700613SupplementaryData.pdf [file CJN.06700613_CJN06700613SupplementaryData.pdf]

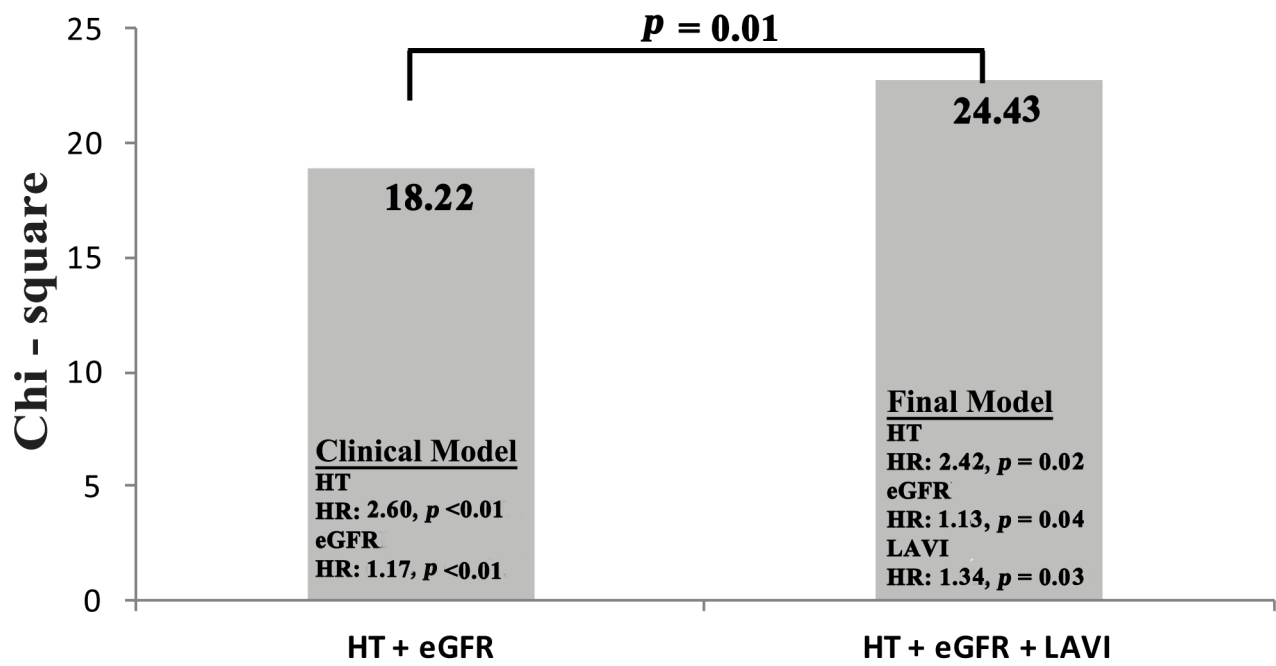

Supplementary Fig 1: Bar graph showing the incremental predictive value of LAVI (HT: hypertension, eGFR: estimated glomerular filtration rate; LAVI: indexed left atrial volume)
